# Supplementary material for: Association Between Pharmacy Proximity With Cardiovascular Medication Use and Risk Factor Control in the United States
Source: PubMed Central journal article supplement — J Am Heart Assoc. 2024 Feb 23;13(5):e031717. doi: 10.1161/JAHA.123.031717 (PMC10944071; doi:10.1161/jaha.123.031717), 2024-02-23
Supplement: JAH3-13-e031717-s001.pdf [file JAH3-13-e031717-s001.pdf]

# **SUPPLEMENTAL MATERIAL**

**Table S1. Table of missing values in the hypertension population.**

| <b>Variable</b>                                                             | <b>All<br/>N=8319</b> | <b>Quartile 1:<br/>N=2080</b> | <b>Quartile 2:<br/>N=2080</b> | <b>Quartile 3:<br/>N=2080</b> | <b>Quartile 4:<br/>N=2079</b> |
|-----------------------------------------------------------------------------|-----------------------|-------------------------------|-------------------------------|-------------------------------|-------------------------------|
| <b>Educational attainment, N (%)</b>                                        | 1 (0%)                | 0 (0%)                        | 1 (0%)                        | 0 (0%)                        | 0 (0%)                        |
| <b>Full-time employment, N (%)</b>                                          | 126 (2%)              | 29 (1.4%)                     | 28 (1.3%)                     | 32 (1.5%)                     | 37 (1.8%)                     |
| <b>Married, N (%)</b>                                                       | 118 (1%)              | 25 (1.2%)                     | 28 (1.3%)                     | 30 (1.4%)                     | 35 (1.7%)                     |
| <b>Lives with others, N (%)</b>                                             | 118 (1%)              | 25 (1.2%)                     | 28 (1.3%)                     | 30 (1.4%)                     | 35 (1.7%)                     |
| <b>Income less than \$35k, N (%)</b>                                        | 1288 (15%)            | 312 (15%)                     | 302 (14.5%)                   | 343 (16.5%)                   | 331 (15.9%)                   |
| <b>Has health insurance, N (%)</b>                                          | 131 (2%)              | 27 (1.3%)                     | 30 (1.4%)                     | 32 (1.5%)                     | 42 (2%)                       |
| <b>Usual source of care, N (%)</b>                                          | 117 (1%)              | 25 (1.2%)                     | 28 (1.3%)                     | 30 (1.4%)                     | 34 (1.6%)                     |
| <b>Has social support, N (%)</b>                                            | 112 (1%)              | 24 (1.2%)                     | 26 (1.2%)                     | 29 (1.4%)                     | 33 (1.6%)                     |
| <b>Current smoking status, N (%)</b>                                        | 165 (2%)              | 36 (1.7%)                     | 36 (1.7%)                     | 46 (2.2%)                     | 47 (2.3%)                     |
| <b>Diabetes, N (%)</b>                                                      | 110 (1%)              | 26 (1.2%)                     | 26 (1.2%)                     | 27 (1.3%)                     | 31 (1.5%)                     |
| <b>BMI, kg/m<sup>2</sup>, N (%)</b>                                         | 45 (1%)               | 11 (0.5%)                     | 9 (0.4%)                      | 9 (0.4%)                      | 16 (0.8%)                     |
| <b>ASCVD, N (%)</b>                                                         | 326 (4%)              | 73 (3.5%)                     | 80 (3.8%)                     | 89 (4.3%)                     | 84 (4%)                       |
| <b>ASCVD risk, N (%)</b>                                                    | 664 (8%)              | 158 (7.6%)                    | 166 (8%)                      | 162 (7.8%)                    | 178 (8.6%)                    |
| <b>ASCVD <math>\geq</math> 7.5%, N (%)</b>                                  | 664 (8%)              | 158 (7.6%)                    | 166 (8%)                      | 162 (7.8%)                    | 178 (8.6%)                    |
| <b>LDL-C, N (%)</b>                                                         | 507 (6%)              | 126 (6.1%)                    | 136 (6.5%)                    | 121 (5.8%)                    | 124 (6%)                      |
| <b>Total cholesterol, N (%)</b>                                             | 460 (6%)              | 117 (5.6%)                    | 121 (5.8%)                    | 107 (5.1%)                    | 115 (5.5%)                    |
| <b>HDL-C, N (%)</b>                                                         | 459 (6%)              | 116 (5.6%)                    | 121 (5.8%)                    | 107 (5.1%)                    | 115 (5.5%)                    |
| <b>Triglycerides, N (%)</b>                                                 | 459 (6%)              | 116 (5.6%)                    | 121 (5.8%)                    | 107 (5.1%)                    | 115 (5.5%)                    |
| <b>Aspirin use, N (%)</b>                                                   | 132 (2%)              | 29 (1.4%)                     | 34 (1.6%)                     | 34 (1.6%)                     | 35 (1.7%)                     |
| <b>eGFR, mL/min/1.73m<sup>2</sup>, N (%)</b>                                | 459 (6%)              | 116 (5.6%)                    | 121 (5.8%)                    | 107 (5.1%)                    | 115 (5.5%)                    |
| <b>PCS-12 score, N (%)</b>                                                  | 592 (7%)              | 119 (5.7%)                    | 135 (6.5%)                    | 154 (7.4%)                    | 184 (8.9%)                    |
| <b>MCS-12 score, N (%)</b>                                                  | 592 (7%)              | 119 (5.7%)                    | 135 (6.5%)                    | 154 (7.4%)                    | 184 (8.9%)                    |
| <b>Perceived stress, N (%)</b>                                              | 112 (1%)              | 25 (1.2%)                     | 26 (1.2%)                     | 29 (1.4%)                     | 32 (1.5%)                     |
| <b>Summative positive self-reported neighborhood characteristics, N (%)</b> | 2357 (28%)            | 569 (27.4%)                   | 608 (29.2%)                   | 617 (29.7%)                   | 563 (27.1%)                   |
| <b>Close-knit neighborhood, N (%)</b>                                       | 2394 (29%)            | 581 (27.9%)                   | 615 (29.6%)                   | 624 (30%)                     | 574 (27.6%)                   |
| <b>Neighbors can be trusted, N (%)</b>                                      | 2405 (29%)            | 584 (28.1%)                   | 615 (29.6%)                   | 625 (30%)                     | 581 (27.9%)                   |
| <b>Safe from crime, N (%)</b>                                               | 2631 (32%)            | 638 (30.7%)                   | 665 (32%)                     | 686 (33%)                     | 642 (30.9%)                   |
| <b>Neighbors willing to help their neighbors, N (%)</b>                     | 2393 (29%)            | 580 (27.9%)                   | 614 (29.5%)                   | 625 (30%)                     | 574 (27.6%)                   |
| <b>Car ownership, N (%)</b>                                                 | 130 (2%)              | 29 (1.4%)                     | 30 (1.4%)                     | 32 (1.5%)                     | 39 (1.9%)                     |

| <b>Variable</b>                                                                                                                                                                                                                                                                        | <b>All<br/>N=8319</b> | <b>Quartile 1:<br/>N=2080</b> | <b>Quartile 2:<br/>N=2080</b> | <b>Quartile 3:<br/>N=2080</b> | <b>Quartile 4:<br/>N=2079</b> |
|----------------------------------------------------------------------------------------------------------------------------------------------------------------------------------------------------------------------------------------------------------------------------------------|-----------------------|-------------------------------|-------------------------------|-------------------------------|-------------------------------|
| BMI = body mass index; ASCVD = atherosclerotic cardiovascular disease; LDL-C = low-density lipoprotein cholesterol; HDL-C = high-density lipoprotein cholesterol = eGFR: estimated glomerular filtration rate = PCS: Physical Component Summary; MCS = Mental Health Component Summary |                       |                               |                               |                               |                               |

**Table S2. Table of missing values in the statin-indicated population.**

| <b>Variable</b>                                                             | <b>All<br/>(N=8569)</b> | <b>Quartile 1:<br/>N=2143</b> | <b>Quartile 2:<br/>N=2142</b> | <b>Quartile 3:<br/>N=2142</b> | <b>Quartile 4:<br/>N=2142</b> |
|-----------------------------------------------------------------------------|-------------------------|-------------------------------|-------------------------------|-------------------------------|-------------------------------|
| <b>Full-time employment, N (%)</b>                                          | 35 (0%)                 | 9(0.4%)                       | 9(0.4%)                       | 9(0.4%)                       | 8(0.4%)                       |
| <b>Married, N (%)</b>                                                       | 27 (0%)                 | 5(0.2%)                       | 9(0.4%)                       | 7(0.3%)                       | 6(0.3%)                       |
| <b>Lives with others, N (%)</b>                                             | 27 (0%)                 | 5(0.2%)                       | 9(0.4%)                       | 7(0.3%)                       | 6(0.3%)                       |
| <b>Income less than \$35k, N (%)</b>                                        | 1295 (15%)              | 320(14.9%)                    | 303(14.1%)                    | 349(16.3%)                    | 323(15.1%)                    |
| <b>Has health insurance, N (%)</b>                                          | 38 (0%)                 | 6(0.3%)                       | 11(0.5%)                      | 9(0.4%)                       | 12(0.6%)                      |
| <b>Usual source of care, N (%)</b>                                          | 27 (0%)                 | 5(0.2%)                       | 9(0.4%)                       | 7(0.3%)                       | 6(0.3%)                       |
| <b>Has social support, N (%)</b>                                            | 19 (0%)                 | 3(0.1%)                       | 6(0.3%)                       | 5(0.2%)                       | 5(0.2%)                       |
| <b>BMI, kg/m2, N (%)</b>                                                    | 32 (0%)                 | 8(0.4%)                       | 10(0.5%)                      | 6(0.3%)                       | 8(0.4%)                       |
| <b>LDL-C, N (%)</b>                                                         | 56 (1%)                 | 11(0.5%)                      | 13(0.6%)                      | 20(0.9%)                      | 12(0.6%)                      |
| <b>Aspirin use, N (%)</b>                                                   | 39 (0%)                 | 9(0.4%)                       | 13(0.6%)                      | 10(0.5%)                      | 7(0.3%)                       |
| <b>PCS-12 score, N (%)</b>                                                  | 504 (6%)                | 95(4.4%)                      | 118(5.5%)                     | 137(6.4%)                     | 154(7.2%)                     |
| <b>MCS-12 score, N (%)</b>                                                  | 504 (6%)                | 95(4.4%)                      | 118(5.5%)                     | 137(6.4%)                     | 154(7.2%)                     |
| <b>Perceived stress, N (%)</b>                                              | 19 (0%)                 | 4(0.2%)                       | 5(0.2%)                       | 4(0.2%)                       | 6(0.3%)                       |
| <b>Summative positive self-reported neighborhood characteristics, N (%)</b> | 2318 (27%)              | 558(26%)                      | 609(28.4%)                    | 601(28.1%)                    | 550(25.7%)                    |
| <b>Close-knit neighborhood, N (%)</b>                                       | 2365 (28%)              | 573(26.7%)                    | 617(28.8%)                    | 611(28.5%)                    | 564(26.3%)                    |
| <b>Neighbors can be trusted, N (%)</b>                                      | 2368 (28%)              | 577(26.9%)                    | 616(28.8%)                    | 607(28.3%)                    | 568(26.5%)                    |
| <b>Safe from crime, N (%)</b>                                               | 2612 (30%)              | 633(29.5%)                    | 671(31.3%)                    | 675(31.5%)                    | 633(29.6%)                    |
| <b>Neighbors willing to help their neighbors, N (%)</b>                     | 2358 (28%)              | 571(26.6%)                    | 616(28.8%)                    | 611(28.5%)                    | 560(26.1%)                    |
| <b>Car ownership, N (%)</b>                                                 | 39 (0%)                 | 8(0.4%)                       | 12(0.6%)                      | 8(0.4%)                       | 11(0.5%)                      |

BMI = body mass index; ASCVD = atherosclerotic cardiovascular disease; LDL-C = low-density lipoprotein cholesterol; HDL-C = high-density lipoprotein cholesterol; eGFR = estimated glomerular filtration rate; PCS = Physical Component Summary; MCS = Mental Health Component Summary

**Table S3. Baseline characteristics of REGARDS participants with hypertension by pharmacy proximity during visit 2.**

| <b>Variable</b>                                             | <b>Summary<br/>(N=8319)</b> | <b>Quartile 1:<br/>N=2080</b> | <b>Quartile 2:<br/>N=2080</b> | <b>Quartile 3:<br/>N=2080</b> | <b>Quartile 4:<br/>N=2079</b> | <b>P-<br/>value</b> |
|-------------------------------------------------------------|-----------------------------|-------------------------------|-------------------------------|-------------------------------|-------------------------------|---------------------|
| <b>Age, Median (IQR)</b>                                    | 73.0 (67.0, 79.0)           | 73.0 (67.0, 78.0)             | 72.0 (67.0, 79.0)             | 73.0 (67.0, 79.0)             | 72.0 (67.0, 79.0)             | 0.87 <sup>j</sup>   |
| <b>Female N (%)</b>                                         | 4756 (57%)                  | 1197(58%)                     | 1159(56%)                     | 1164(56%)                     | 1236(59%)                     | 0.22 <sup>q</sup>   |
| <b>Race, N (%) -</b>                                        |                             |                               |                               |                               |                               |                     |
| Non-Hispanic White                                          | 4599 (55%)                  | 1166(56%)                     | 1072(52%)                     | 1142(55%)                     | 1219(59%)                     | 0.02 <sup>q</sup>   |
| Non-Hispanic Black                                          | 3720 (45%)                  | 914(44%)                      | 1008(48%)                     | 938(45%)                      | 860(41%)                      | 0.02 <sup>q</sup>   |
| <b>Educational attainment, N (%) -</b>                      | 778 (9%)                    | 180(9%)                       | 157(8%)                       | 203(10%)                      | 238(11%)                      | <0.01 <sup>c</sup>  |
| <High School                                                |                             |                               |                               |                               |                               |                     |
| High School                                                 | 2111 (25%)                  | 497(24%)                      | 527(25%)                      | 514(25%)                      | 573(28%)                      | -                   |
| > High School                                               | 5429 (65%)                  | 1403(67%)                     | 1395(67%)                     | 1363(66%)                     | 1268(61%)                     | -                   |
| <b>Full-time employment, N (%)</b>                          | 1491 (18%)                  | 360(18%)                      | 374(18%)                      | 392(19%)                      | 365(18%)                      | 0.62 <sup>q</sup>   |
| <b>Married, N (%)</b>                                       | 4342 (53%)                  | 1172(57%)                     | 1046(51%)                     | 1042(51%)                     | 1082(53%)                     | 0.01 <sup>q</sup>   |
| <b>Lives with others, N (%)</b>                             | 5655 (69%)                  | 1494(73%)                     | 1367(67%)                     | 1396(68%)                     | 1398(68%)                     | 0.01 <sup>q</sup>   |
| <b>Income less than \$35k, N (%)</b>                        | 3183 (45%)                  | 704(40%)                      | 793(45%)                      | 782(45%)                      | 904(52%)                      | <0.01 <sup>q</sup>  |
| <b>Has health insurance, N (%)</b>                          | 8097 (99%)                  | 2033(99%)                     | 2029(99%)                     | 2022(99%)                     | 2013(99%)                     | 0.41 <sup>q</sup>   |
| <b>Usual source of care, N (%)</b>                          | 8071 (98%)                  | 2015(98%)                     | 2018(98%)                     | 2020(99%)                     | 2018(99%)                     | 0.09 <sup>q</sup>   |
| <b>Has social support, N (%)</b>                            | 6316 (77%)                  | 1649(80%)                     | 1559(76%)                     | 1595(78%)                     | 1513(74%)                     | <0.01 <sup>q</sup>  |
| <b>Current smoking status, N (%)</b>                        | 625 (8%)                    | 133(7%)                       | 158(8%)                       | 149(7%)                       | 185(9%)                       | <0.01 <sup>q</sup>  |
| <b>Diabetes, N (%)</b>                                      | 2637 (32%)                  | 653(32%)                      | 687(33%)                      | 650(32%)                      | 647(32%)                      | 0.61 <sup>q</sup>   |
| <b>Hypertension, N (%)</b>                                  | 8034 (97%)                  | 2003(96%)                     | 2007(96%)                     | 2008(97%)                     | 2016(97%)                     | 0.25 <sup>q</sup>   |
| <b>SBP, Median (IQR)</b>                                    | 127.0 (119.0, 136.0)        | 127.0 (118.0, 136.0)          | 127.0 (119.0, 137.0)          | 126.0 (118.0, 136.0)          | 128.0 (119.0, 136.0)          | 0.57 <sup>j</sup>   |
| <b>DBP, median (IQR)</b>                                    | 76.0 (69.0, 80.0)           | 75.0 (69.0, 80.0)             | 76.0 (69.0, 81.0)             | 75.0 (69.0, 80.0)             | 76.0 (70.0, 81.0)             | 0.93 <sup>j</sup>   |
| <b>Antihypertensive medication, N (%)</b>                   | 7020 (84%)                  | 1731(83%)                     | 1741(84%)                     | 1770(85%)                     | 1778(86%)                     | 0.02 <sup>q</sup>   |
| <b>Number of antihypertensive medications, Median (IQR)</b> | 2.0 (1.0, 3.0)              | 2.0 (1.0, 3.0)                | 2.0 (1.0, 3.0)                | 2.0 (1.0, 3.0)                | 2.0 (1.0, 3.0)                | 0.12 <sup>j</sup>   |
| <b>BMI, kg/m2 , Median (IQR)</b>                            | 29.0 (25.5, 33.2)           | 29.1 (25.7, 33.5)             | 28.9 (25.4, 33.0)             | 29.0 (25.5, 33.4)             | 28.8 (25.6, 32.9)             | 0.19 <sup>j</sup>   |

| <b>Variable</b>                                                                    | <b>Summary<br/>(N=8319)</b> | <b>Quartile 1:<br/>N=2080</b> | <b>Quartile 2:<br/>N=2080</b> | <b>Quartile 3:<br/>N=2080</b> | <b>Quartile 4:<br/>N=2079</b> | <b>P-<br/>value</b> |
|------------------------------------------------------------------------------------|-----------------------------|-------------------------------|-------------------------------|-------------------------------|-------------------------------|---------------------|
| <b>ASCVD, N (%)</b>                                                                | 2672 (33%)                  | 634(32%)                      | 631(32%)                      | 679(34%)                      | 728(36%)                      | <0.01 <sup>q</sup>  |
| <b>ASCVD risk, Median (IQR)</b>                                                    | 0.2 (0.1, 0.3)              | 0.2 (0.1, 0.3)                | 0.2 (0.1, 0.3)                | 0.2 (0.1, 0.3)                | 0.2 (0.1, 0.3)                | 0.04 <sup>j</sup>   |
| <b>ASCVD &gt; 7.5%, N (%)</b>                                                      | 6929 (91%)                  | 1719(89%)                     | 1753(92%)                     | 1739(91%)                     | 1718(90%)                     | 0.5 <sup>q</sup>    |
| <b>LDL-C, Median (IQR)</b>                                                         | 94.0 (73.6, 119.0)          | 95.0 (73.2, 120.9)            | 93.0 (73.7, 117.9)            | 94.0 (73.0, 119.6)            | 94.5 (74.4, 118.0)            | 0.92 <sup>j</sup>   |
| <b>Total cholesterol, Median (IQR)</b>                                             | 174.0 (149.0, 202.0)        | 176.0 (150.0, 205.0)          | 173.0 (149.0, 200.0)          | 174.0 (149.0, 203.0)          | 174.0 (150.0, 202.0)          | 0.71 <sup>j</sup>   |
| <b>HDL cholesterol, Median (IQR)</b>                                               | 53.0 (43.0, 66.0)           | 53.0 (44.0, 66.0)             | 54.0 (44.0, 66.0)             | 53.0 (43.0, 66.0)             | 53.0 (43.0, 65.0)             | 0.09 <sup>j</sup>   |
| <b>Triglycerides, Median (IQR)</b>                                                 | 101.5 (76.0, 140.0)         | 101.0 (76.0, 141.0)           | 99.0 (73.0, 137.0)            | 101.0 (76.0, 142.0)           | 104.0 (78.0, 143.0)           | 0.06 <sup>j</sup>   |
| <b>Statin use, N (%)</b>                                                           | 4306 (52%)                  | 1090(52%)                     | 1107(53%)                     | 1053(51%)                     | 1056(51%)                     | 0.13 <sup>q</sup>   |
| <b>Aspirin use, N (%)</b>                                                          | 4776 (58%)                  | 1186(58%)                     | 1182(58%)                     | 1203(59%)                     | 1205(59%)                     | 0.37 <sup>q</sup>   |
| <b>Total number of prescription medications, Median (IQR)</b>                      | 8.0 (5.0, 11.0)             | 8.0 (5.0, 11.0)               | 8.0 (5.0, 11.0)               | 8.0 (5.0, 11.0)               | 8.0 (6.0, 11.0)               | 0.02 <sup>j</sup>   |
| <b>eGFR, mL/min/1.73m<sup>2</sup>, Median (IQR)</b>                                | 71.5 (55.9, 86.8)           | 72.0 (56.8, 86.9)             | 72.8 (56.2, 87.8)             | 70.7 (55.3, 86.0)             | 71.0 (55.6, 86.3)             | 0.11 <sup>j</sup>   |
| <b>PCS-12 score, Median (IQR)</b>                                                  | 46.9 (36.1, 53.1)           | 47.5 (36.0, 53.1)             | 47.2 (36.2, 53.4)             | 47.0 (36.8, 52.9)             | 45.9 (35.4, 52.8)             | 0.04 <sup>j</sup>   |
| <b>MCS-12 score, Median (IQR)</b>                                                  | 57.8 (53.2, 59.9)           | 57.8 (53.7, 60.1)             | 57.7 (53.1, 59.9)             | 57.8 (53.3, 60.0)             | 57.5 (52.7, 59.9)             | 0.09 <sup>j</sup>   |
| <b>Perceived stress, Median (IQR)</b>                                              | 3.0 (0.0, 5.0)              | 2.0 (0.0, 5.0)                | 3.0 (0.0, 5.0)                | 3.0 (1.0, 5.0)                | 3.0 (1.0, 5.0)                | <0.01 <sup>j</sup>  |
| <b>Summative positive self-reported neighborhood characteristics, Median (IQR)</b> | 3.0 (1.0, 4.0)              | 3.0 (1.0, 4.0)                | 2.0 (1.0, 4.0)                | 3.0 (1.0, 4.0)                | 3.0 (1.0, 4.0)                | 0.84 <sup>j</sup>   |
| <b>Close-knit neighborhood, N (%)</b>                                              | 2655 (45%)                  | 693(46%)                      | 626(43%)                      | 619(43%)                      | 717(48%)                      | 0.48 <sup>q</sup>   |
| <b>Neighbors can be trusted, N (%)</b>                                             | 3747 (63%)                  | 969(65%)                      | 871(59%)                      | 925(64%)                      | 982(66%)                      | 0.25 <sup>q</sup>   |
| <b>Safe from crime, N (%)</b>                                                      | 3478 (61%)                  | 917(64%)                      | 837(59%)                      | 844(61%)                      | 880(61%)                      | 0.32 <sup>q</sup>   |
| <b>Neighbors willing to help their neighbors, N (%)</b>                            | 4382 (74%)                  | 1128(75%)                     | 1049(72%)                     | 1074(74%)                     | 1131(75%)                     | 0.68 <sup>q</sup>   |
| <b>Car ownership, N (%)</b>                                                        | 7335 (90%)                  | 1886 (92%)                    | 1836 (90%)                    | 1791 (87%)                    | 1822 (89%)                    | <0.01 <sup>q</sup>  |
| <b>Population density, N (%) -</b>                                                 |                             |                               |                               |                               |                               |                     |

| <b>Variable</b> | <b>Summary<br/>(N=8319)</b> | <b>Quartile 1:<br/>N=2080</b> | <b>Quartile 2:<br/>N=2080</b> | <b>Quartile 3:<br/>N=2080</b> | <b>Quartile 4:<br/>N=2079</b> | <b>P-<br/>value</b> |
|-----------------|-----------------------------|-------------------------------|-------------------------------|-------------------------------|-------------------------------|---------------------|
| Rural           | 2875 (35%)                  | 979 (47%)                     | 424 (20%)                     | 505 (24%)                     | 967 (47%)                     | <0.01 <sup>c</sup>  |
| Suburban        | 2458 (30%)                  | 394 (19%)                     | 610 (29%)                     | 698 (34%)                     | 756 (36%)                     | -                   |
| Urban           | 2986 (36%)                  | 707 (34%)                     | 1046 (50%)                    | 877 (42%)                     | 356 (17%)                     | -                   |

<sup>j</sup> Jonckheere-Terpstra test, <sup>q</sup> Cochran-Armitage test for trend, <sup>c</sup> Chi-squared test.

BMI = body mass index; ASCVD = atherosclerotic cardiovascular disease; LDL-C = low-density lipoprotein cholesterol; HDL-C = high-density lipoprotein cholesterol; eGFR = estimated glomerular filtration rate; PCS = Physical Component Summary; MCS = Mental Health Component Summary; SBP = systolic blood pressure; DBP = diastolic blood pressure





| Variable                                                                    | Summary<br>N=8569       | Quartile 1:<br>N=2143   | Quartile 2:<br>N=2142   | Quartile 3:<br>N=2142   | Quartile 4:<br>N=2142   | P-value            |
|-----------------------------------------------------------------------------|-------------------------|-------------------------|-------------------------|-------------------------|-------------------------|--------------------|
| ASCVD > 7.5%, N (%)                                                         | 8275 (97%)              | 2068(97%)               | 2084(97%)               | 2059(96%)               | 2064(96%)               | 0.37 <sup>q</sup>  |
| LDL-C, Median (IQR)                                                         | 94.9 (74.2,<br>119.4)   | 95.8 (73.8,<br>122.4)   | 94.0 (73.9,<br>118.1)   | 94.6 (74.3,<br>119.6)   | 95.0 (75.0,<br>118.2)   | 0.82 <sup>j</sup>  |
| Total cholesterol, Median (IQR)                                             | 175.0 (150.0,<br>203.0) | 177.0 (149.5,<br>206.0) | 173.0 (149.0,<br>201.0) | 175.0 (150.0,<br>203.0) | 174.0 (150.0,<br>202.0) | 0.64 <sup>j</sup>  |
| HDL-C, Median (IQR)                                                         | 53.0 (43.0, 65.0)       | 54.0 (44.0, 66.0)       | 53.0 (43.0, 65.0)       | 53.0 (43.0, 66.0)       | 53.0 (43.0, 65.0)       | 0.03 <sup>j</sup>  |
| Triglycerides, Median (IQR)                                                 | 101.0 (75.0,<br>140.0)  | 99.0 (75.0,<br>140.0)   | 98.0 (73.0,<br>136.0)   | 102.0 (77.2,<br>142.0)  | 104.0 (77.0,<br>144.0)  | <0.01 <sup>j</sup> |
| Statin use, N (%)                                                           | 4325 (50%)              | 1093(51%)               | 1124(52%)               | 1067(50%)               | 1041(49%)               | 0.04 <sup>q</sup>  |
| Aspirin use, N (%)                                                          | 4944 (58%)              | 1237(58%)               | 1217(57%)               | 1229(58%)               | 1261(59%)               | 0.43 <sup>q</sup>  |
| Total number of prescription medications, Median (IQR)                      | 8.0 (5.0, 11.0)         | 8.0 (5.0, 11.0)         | 8.0 (5.0, 11.0)         | 8.0 (5.0, 11.0)         | 8.0 (5.0, 11.0)         | 0.07 <sup>j</sup>  |
| eGFR, mL/min/1.73m <sup>2</sup> , Median (IQR)                              | 71.3 (56.1, 85.9)       | 70.9 (56.7, 85.5)       | 72.8 (56.6, 86.8)       | 70.9 (55.9, 85.8)       | 70.2 (55.6, 85.3)       | 0.18 <sup>j</sup>  |
| PCS-12 score, Median (IQR)                                                  | 47.8 (37.0, 53.6)       | 48.3 (37.2, 53.5)       | 48.2 (37.5, 53.8)       | 47.7 (37.6, 53.4)       | 46.8 (36.1, 53.3)       | 0.01 <sup>j</sup>  |
| MCS-12 score, Median (IQR)                                                  | 57.8 (53.5, 59.9)       | 57.8 (54.0, 60.2)       | 57.6 (53.2, 59.8)       | 57.8 (53.7, 59.9)       | 57.8 (53.0, 60.0)       | 0.18 <sup>j</sup>  |
| Perceived stress, median (IQR)                                              | 3.0 (0.0, 5.0)          | 2.0 (0.0, 5.0)          | 3.0 (0.0, 5.0)          | 3.0 (0.0, 5.0)          | 3.0 (0.0, 5.0)          | <0.01 <sup>j</sup> |
| Summative positive self-reported neighborhood characteristics, Median (IQR) | 3.0 (1.0, 4.0)          | 3.0 (2.0, 4.0)          | 3.0 (1.0, 4.0)          | 3.0 (1.0, 4.0)          | 3.0 (1.0, 4.0)          | 0.36 <sup>j</sup>  |
| Close-knit neighborhood, N (%)                                              | 2822 (45%)              | 751 (48%)               | 668 (44%)               | 648 (42%)               | 755 (48%)               | 0.81 <sup>q</sup>  |
| Neighbors can be trusted, N (%)                                             | 4032 (65%)              | 1050 (67%)              | 957 (63%)               | 991 (65%)               | 1034 (66%)              | 0.67 <sup>q</sup>  |
| Safe from crime, N (%)                                                      | 3776 (63%)              | 1000 (66%)              | 909 (62%)               | 920 (63%)               | 947 (63%)               | 0.09 <sup>q</sup>  |
| Neighbors willing to help their neighbors, N (%)                            | 4702 (76%)              | 1201(76%)               | 1129 (74%)              | 1158 (76%)              | 1214 (77%)              | 0.59 <sup>q</sup>  |
| Car ownership, N (%)                                                        | 7738 (91%)              | 1983 (93%)              | 1928 (91%)              | 1903 (89%)              | 1924 (90%)              | 0.01 <sup>q</sup>  |
| Population density, N(%) -                                                  |                         |                         |                         |                         |                         |                    |
| Rural                                                                       | 3027 (35%)              | 1055 (49%)              | 457 (21%)               | 516 (24%)               | 999 (47%)               | <0.01 <sup>c</sup> |
| Suburban                                                                    | 2541 (30%)              | 417 (19%)               | 621 (29%)               | 723 (34%)               | 780 (36%)               | -                  |
| Urban                                                                       | 3001 (35%)              | 671 (31%)               | 1064 (50%)              | 903 (42%)               | 363 (17%)               | -                  |

<sup>j</sup> Jonckheere-Terpstra test, <sup>q</sup> Cochran-Armitage test for trend, <sup>c</sup> Chi-squared test.

| <b>Variable</b>                                                                                                                                                                                                                                                                                                                                       | <b>Summary<br/>N=8569</b> | <b>Quartile 1:<br/>N=2143</b> | <b>Quartile 2:<br/>N=2142</b> | <b>Quartile 3:<br/>N=2142</b> | <b>Quartile 4:<br/>N=2142</b> | <b>P-value</b> |
|-------------------------------------------------------------------------------------------------------------------------------------------------------------------------------------------------------------------------------------------------------------------------------------------------------------------------------------------------------|---------------------------|-------------------------------|-------------------------------|-------------------------------|-------------------------------|----------------|
| BMI = body mass index; ASCVD = atherosclerotic cardiovascular disease; LDL-C = low-density lipoprotein cholesterol; HDL-C = high-density lipoprotein cholesterol; eGFR = estimated glomerular filtration rate; PCS = Physical Component Summary; MCS = Mental Health Component Summary; SBP = systolic blood pressure; DBP = diastolic blood pressure |                           |                               |                               |                               |                               |                |



|                            |              |              |              |              |              |              |              |              |             |              |             |              |
|----------------------------|--------------|--------------|--------------|--------------|--------------|--------------|--------------|--------------|-------------|--------------|-------------|--------------|
| Quartile 2 $\beta$<br>(SE) | 0.12 (0.33)  | -0.14 (0.61) | -0.56 (0.43) | -0.05 (0.26) | 0.2 (0.79)   | -0.01 (0.05) | -1.03 (0.63) | 0 (0.43)     | 0.17 (0.28) | -0.16 (0.16) | 0.35 (0.28) | -0.23 (0.22) |
| Quartile 3 $\beta$<br>(SE) | -0.09 (0.34) | -0.19 (0.56) | -0.27 (0.47) | 0.06 (0.22)  | -0.56 (0.71) | -0.08 (0.08) | -0.37 (0.42) | 1.18 (0.71)  | 0.1 (0.27)  | -0.1 (0.10)  | 0.16 (0.29) | -0.06 (0.07) |
| Quartile 4 $\beta$<br>(SE) | -0.2 (0.29)  | 0.13 (0.77)  | -0.23 (0.54) | -0.14 (0.37) | -0.59 (0.73) | -0.06 (0.08) | -1.09 (0.65) | -0.85 (0.59) | 0.9 (0.76)  | 0.03 (0.10)  | 0.02 (0.19) | 0 (0.20)     |
| P for trend                | 0.46         | 0.84         | 0.90         | 0.76         | 0.23         | 0.35         | 0.12         | 0.32         | 0.24        | 0.65         | 0.67        | 0.79         |

Adjusted for age, educational attainment, employment status, income, health insurance, usual source of care, car ownership, level of social support (defined by score of six-survey items of social support), self-reported neighborhood characteristics (i.e., agreement with “This is a close-knit neighborhood”, “People in this neighborhood can be trusted”, “People around here are willing to help their neighbors”, and “How safe from crime do you consider your neighborhood to be?”), current cigarette smoking, self-reported diabetes status, systolic blood pressure (in the statin use and LDL-C models only), diastolic blood pressure (in the statin use and LDL-C models only), body mass index, total cholesterol, physical functioning based on the Short Form 12 Physical Component Summary [PCS] score, mental health based on the Short Form 12 Mental Health Component Summary [MCS] score, aspirin use, and number of total prescription medications. Systolic blood pressure and diastolic blood pressure are not included in the blood pressure control outcome model.

**Table S6. Association between pharmacy proximity and antihypertensive medication use, statin use blood pressure control, and low-density lipoprotein level, separately, among REGARDS participants during visit 2, by age.**

|                                                  | Age              |                       |                  |                  |                       |                  |
|--------------------------------------------------|------------------|-----------------------|------------------|------------------|-----------------------|------------------|
|                                                  | Rural            | ≥65 years<br>Suburban | Urban            | Rural            | <65 years<br>Suburban | Urban            |
| <b>Antihypertensive medication use</b>           |                  |                       |                  |                  |                       |                  |
| Quartile 1 PR (95% CI)                           | Reference        | Reference             | Reference        | Reference        | Reference             | Reference        |
| Quartile 2 PR (95% CI)                           | 1.00 (0.95,1.05) | 1.02 (0.97,1.07)      | 1.01 (0.97,1.05) | 0.85 (0.70,1.05) | 1.04 (0.85,1.27)      | 0.95 (0.83,1.09) |
| Quartile 3 PR (95% CI)                           | 1.03 (0.98,1.07) | 1.02 (0.97,1.08)      | 1.01 (0.97,1.05) | 1.04 (0.89,1.20) | 1.13 (0.93,1.37)      | 0.96 (0.83,1.10) |
| Quartile 4 PR (95% CI)                           | 1.03 (0.99,1.07) | 1.01 (0.96,1.06)      | 1.00 (0.94,1.05) | 0.97 (0.85,1.11) | 1.18 (1.00,1.40)      | 1.06 (0.90,1.24) |
| P for trend                                      | 0.12             | 0.89                  | 0.87             | 0.99             | 0.02                  | 0.69             |
| <b>Statin use</b>                                |                  |                       |                  |                  |                       |                  |
| Quartile 1 PR (95% CI)                           | Reference        | Reference             | Reference        | Reference        | Reference             | Reference        |
| Quartile 2 PR (95% CI)                           | 1.04 (0.95,1.15) | 1.05 (0.95,1.18)      | 1.00 (0.92,1.09) | 1.22 (0.92,1.60) | 0.81 (0.54,1.22)      | 0.88 (0.63,1.22) |
| Quartile 3 PR (95% CI)                           | 0.94 (0.86,1.04) | 0.98 (0.88,1.09)      | 1.00 (0.91,1.09) | 0.86 (0.60,1.24) | 0.88 (0.59,1.32)      | 0.89 (0.63,1.26) |
| Quartile 4 PR (95% CI)                           | 0.96 (0.88,1.04) | 0.92 (0.83,1.03)      | 0.99 (0.88,1.12) | 0.81 (0.60,1.10) | 0.87 (0.62,1.22)      | 0.71 (0.44,1.16) |
| P for trend                                      | 0.16             | 0.03                  | 0.90             | 0.11             | 0.70                  | 0.24             |
| <b>Blood pressure control</b>                    |                  |                       |                  |                  |                       |                  |
| Quartile 1 PR (95% CI)                           | Reference        | Reference             | Reference        | Reference        | Reference             | Reference        |
| Quartile 2 PR (95% CI)                           | 0.94 (0.88,1.00) | 1.00 (0.93,1.08)      | 0.97 (0.93,1.02) | 1.18 (1.03,1.35) | 0.87 (0.75,1.01)      | 0.94 (0.83,1.07) |
| Quartile 3 PR (95% CI)                           | 0.98 (0.93,1.04) | 1.03 (0.96,1.10)      | 0.97 (0.92,1.02) | 1.09 (0.94,1.25) | 0.96 (0.84,1.10)      | 1.02 (0.91,1.16) |
| Quartile 4 PR (95% CI)                           | 0.98 (0.93,1.03) | 1.02 (0.96,1.10)      | 1.03 (0.97,1.09) | 1.00 (0.88,1.13) | 0.88 (0.77,1.00)      | 1.00 (0.86,1.17) |
| P for trend                                      | 0.56             | 0.35                  | 0.69             | 0.94             | 0.22                  | 0.61             |
| <b>Low-density lipoprotein cholesterol level</b> |                  |                       |                  |                  |                       |                  |
| Quartile 1 β (SE)                                | Reference        | Reference             | Reference        | Reference        | Reference             | Reference        |
| Quartile 2 β (SE)                                | -0.31 (0.78)     | 0.62 (0.88)           | 0.86 (0.71)      | -0.37 (2.12)     | 1.26 (2.82)           | 0.89 (2.33)      |
| Quartile 3 β (SE)                                | 0.40 (0.70)      | -0.04 (0.85)          | 1.06 (0.73)      | 1.64 (2.02)      | -0.45 (2.73)          | 2.36 (2.49)      |
| Quartile 4 β (SE)                                | 0.14 (0.61)      | 0.86 (0.85)           | 0.16 (0.92)      | -2.67 (1.80)     | -0.44 (2.5)           | -1.02 (3.11)     |
| P for trend                                      | 0.68             | 0.46                  | 0.54             | 0.23             | 0.63                  | 0.85             |

Adjusted for sex, race, educational attainment, employment status, income, health insurance, usual source of care, car ownership, level of social support (defined by score of six-survey items of social support), self-reported neighborhood characteristics (i.e., agreement with “This is a close-knit neighborhood”, “People in this neighborhood can be trusted”, “People around here are willing to help their neighbors”, and “How safe from crime do you consider your neighborhood to be?”), current cigarette smoking, self-reported diabetes

status, systolic blood pressure (in the statin use and LDL-C models only), diastolic blood pressure (in the statin use and LDL-C models only), body mass index, total cholesterol, physical functioning based on the Short Form 12 Physical Component Summary [PCS] score, mental health based on the Short Form 12 Mental Health Component Summary [MCS] score, aspirin use, and number of total prescription medications. Systolic blood pressure and diastolic blood pressure are not included in the blood pressure control outcome model.

CI = confidence interval; eGFR = estimated glomerular filtration rate; LDL-C = low-density lipoprotein cholesterol; PR = prevalence ratio; SE = standard error

**Table S7. Association between pharmacy proximity and antihypertensive medication use, statin use blood pressure control, and low-density lipoprotein level, separately, among REGARDS participants during visit 2, by polypharmacy.**

|                         | <b>Polypharmacy status</b>                       |                  |                  |                                   |                  |                  |
|-------------------------|--------------------------------------------------|------------------|------------------|-----------------------------------|------------------|------------------|
|                         | <b>&lt;5 prescription medication</b>             |                  |                  | <b>≥5 prescription medication</b> |                  |                  |
|                         | <b>Rural</b>                                     | <b>Suburban</b>  | <b>Urban</b>     | <b>Rural</b>                      | <b>Suburban</b>  | <b>Urban</b>     |
|                         | <b>Antihypertensive medication use</b>           |                  |                  |                                   |                  |                  |
| Quartile 1 PR (95% CI)  | Reference                                        | Reference        | Reference        | Reference                         | Reference        | Reference        |
| Quartile 2 PR (95% CI)  | 0.96 (0.71,1.28)                                 | 1.06 (0.83,1.35) | 0.95 (0.79,1.13) | 0.98 (0.94,1.03)                  | 1.00 (0.95,1.04) | 0.99 (0.96,1.02) |
| Quartile 3 PR (95% CI)  | 1.11 (0.86,1.43)                                 | 1.12 (0.88,1.42) | 1.03 (0.88,1.22) | 1.02 (0.98,1.06)                  | 1.01 (0.97,1.05) | 0.99 (0.96,1.02) |
| Quartile 4 PR (95% CI)  | 1.14 (0.91,1.41)                                 | 1.06 (0.83,1.35) | 0.97 (0.77,1.22) | 1.01 (0.98,1.04)                  | 1.01 (0.97,1.06) | 0.99 (0.95,1.04) |
| P for trend             | 0.18                                             | 0.61             | 0.84             | 0.28                              | 0.43             | 0.64             |
|                         | <b>Statin use</b>                                |                  |                  |                                   |                  |                  |
| Quartile 1 PR (95% CI)  | Reference                                        | Reference        | Reference        | Reference                         | Reference        | Reference        |
| Quartile 2 PR (95% CI)  | 1.35 (0.93,1.96)                                 | 1.38 (0.86,2.22) | 1.07 (0.72,1.57) | 1.03 (0.94,1.12)                  | 1.01 (0.91,1.12) | 0.98 (0.90,1.06) |
| Quartile 3 PR (95% CI)  | 0.83 (0.51,1.34)                                 | 1.23 (0.75,2.02) | 1.05 (0.69,1.59) | 0.95 (0.87,1.04)                  | 0.94 (0.85,1.05) | 0.99 (0.91,1.07) |
| Quartile 4 PR (95% CI)  | 1.16 (0.82,1.64)                                 | 1.29 (0.79,2.12) | 1.31 (0.77,2.21) | 0.94 (0.87,1.01)                  | 0.90 (0.81,1.00) | 0.93 (0.83,1.04) |
| P for trend             | 0.76                                             | 0.57             | 0.42             | 0.06                              | 0.01             | 0.33             |
|                         | <b>Blood pressure control</b>                    |                  |                  |                                   |                  |                  |
| Quartile 1 PR (95% CI)  | Reference                                        | Reference        | Reference        | Reference                         | Reference        | Reference        |
| Quartile 2 PR (95% CI)  | 1.05 (0.88,1.25)                                 | 0.92 (0.79,1.08) | 0.89 (0.80,0.99) | 0.95 (0.89,1.01)                  | 1.00 (0.93,1.07) | 0.98 (0.93,1.03) |
| Quartile 3 PR (95% CI)  | 1.13 (0.97,1.32)                                 | 0.97 (0.84,1.11) | 0.99 (0.90,1.09) | 0.98 (0.92,1.03)                  | 1.03 (0.97,1.10) | 0.96 (0.91,1.01) |
| Quartile 4 PR (95% CI)  | 1.16 (1.02,1.32)                                 | 1.01 (0.88,1.16) | 0.99 (0.88,1.13) | 0.96 (0.91,1.00)                  | 1.00 (0.94,1.07) | 1.03 (0.97,1.09) |
| P for trend             | 0.02                                             | 0.62             | 0.67             | 0.11                              | 0.79             | 0.95             |
|                         | <b>Low-density lipoprotein cholesterol level</b> |                  |                  |                                   |                  |                  |
| Quartile 1 $\beta$ (SE) | Reference                                        | Reference        | Reference        | Reference                         | Reference        | Reference        |
| Quartile 2 $\beta$ (SE) | 0.77 (1.85)                                      | 0.59 (1.80)      | 1.32 (1.44)      | -0.38 (0.80)                      | 0.90 (0.97)      | 0.64 (0.76)      |
| Quartile 3 $\beta$ (SE) | 1.40 (1.52)                                      | -1.56 (1.84)     | 2.02 (1.44)      | 0.16 (0.73)                       | 0.54 (0.92)      | 0.85 (0.79)      |
| Quartile 4 $\beta$ (SE) | -1.27 (1.37)                                     | -2.75 (1.94)     | 1.67 (1.84)      | -0.01 (0.63)                      | 1.82 (0.9)       | -0.36 (1.00)     |
| P for trend             | 0.43                                             | 0.06             | 0.21             | 0.91                              | 0.06             | 0.92             |

Adjusted for age, sex, race, educational attainment, employment status, income, health insurance, usual source of care, car ownership, level of social support (defined by score of six-survey items of social support), self-reported neighborhood characteristics (i.e., agreement with “This is a close-knit neighborhood”, “People in this neighborhood can be trusted”, “People around here are willing to help their neighbors”, and “How safe from crime do you consider your neighborhood to be?”), current cigarette smoking, self-reported

diabetes status, systolic blood pressure (in the statin use and LDL-C models only), diastolic blood pressure (in the statin use and LDL-C models only), body mass index, total cholesterol, physical functioning based on the Short Form 12 Physical Component Summary [PCS] score, mental health based on the Short Form 12 Mental Health Component Summary [MCS] score, and aspirin use. Systolic blood pressure and diastolic blood pressure are not included in the blood pressure control outcome model.

CI = confidence interval; eGFR = estimated glomerular filtration rate; LDL-C = low-density lipoprotein cholesterol; PR = prevalence ratio; SE = standard error



**Table S8. Association between pharmacy proximity and antihypertensive medication use, statin use blood pressure control, and low-density lipoprotein level, separately, among REGARDS participants during visit 2, by car ownership.**

|                         | <b>Car ownership status</b>                      |                  |                  |                  |                  |                  |
|-------------------------|--------------------------------------------------|------------------|------------------|------------------|------------------|------------------|
|                         | <b>No car ownership</b>                          |                  |                  | <b>Own car</b>   |                  |                  |
|                         | <b>Rural</b>                                     | <b>Suburban</b>  | <b>Urban</b>     | <b>Rural</b>     | <b>Suburban</b>  | <b>Urban</b>     |
|                         | <b>Antihypertensive medication use</b>           |                  |                  |                  |                  |                  |
| Quartile 1 PR (95% CI)  | Reference                                        | Reference        | Reference        | Reference        | Reference        | Reference        |
| Quartile 2 PR (95% CI)  | 0.95 (0.80,1.12)                                 | 1.10 (0.93,1.30) | 0.98 (0.90,1.07) | 0.99 (0.94,1.04) | 1.02 (0.96,1.08) | 1.00 (0.95,1.04) |
| Quartile 3 PR (95% CI)  | 0.98 (0.83,1.15)                                 | 1.13 (0.97,1.32) | 1.01 (0.93,1.10) | 1.03 (0.98,1.07) | 1.03 (0.98,1.09) | 1.00 (0.96,1.05) |
| Quartile 4 PR (95% CI)  | 1.03 (0.91,1.16)                                 | 1.09 (0.93,1.29) | 1.01 (0.90,1.13) | 1.02 (0.98,1.06) | 1.04 (0.98,1.09) | 1.01 (0.95,1.07) |
| P for trend             | 0.50                                             | 0.36             | 0.63             | 0.22             | 0.17             | 0.76             |
|                         | <b>Statin use</b>                                |                  |                  |                  |                  |                  |
| Quartile 1 PR (95% CI)  | Reference                                        | Reference        | Reference        | Reference        | Reference        | Reference        |
| Quartile 2 PR (95% CI)  | 1.35 (0.93,1.96)                                 | 1.12 (0.65,1.93) | 0.89 (0.69,1.16) | 1.05 (0.96,1.15) | 1.04 (0.94,1.16) | 1.02 (0.93,1.12) |
| Quartile 3 PR (95% CI)  | 0.90 (0.55,1.48)                                 | 1.33 (0.82,2.16) | 1.02 (0.81,1.29) | 0.95 (0.86,1.04) | 0.96 (0.86,1.07) | 1.02 (0.93,1.13) |
| Quartile 4 PR (95% CI)  | 1.08 (0.77,1.52)                                 | 1.32 (0.81,2.13) | 0.90 (0.66,1.23) | 0.95 (0.88,1.03) | 0.91 (0.82,1.01) | 1.00 (0.88,1.14) |
| P for trend             | 0.99                                             | 0.20             | 0.91             | 0.10             | 0.01             | 0.87             |
|                         | <b>Blood pressure control</b>                    |                  |                  |                  |                  |                  |
| Quartile 1 PR (95% CI)  | Reference                                        | Reference        | Reference        | Reference        | Reference        | Reference        |
| Quartile 2 PR (95% CI)  | 0.94 (0.72,1.22)                                 | 1.03 (0.77,1.37) | 0.92 (0.79,1.07) | 0.97 (0.91,1.03) | 0.97 (0.91,1.03) | 0.98 (0.93,1.02) |
| Quartile 3 PR (95% CI)  | 1.09 (0.88,1.34)                                 | 1.08 (0.84,1.39) | 1.02 (0.89,1.17) | 1.00 (0.94,1.05) | 1.00 (0.95,1.07) | 0.97 (0.92,1.02) |
| Quartile 4 PR (95% CI)  | 1.02 (0.83,1.25)                                 | 1.08 (0.84,1.38) | 1.04 (0.88,1.21) | 0.99 (0.94,1.04) | 0.98 (0.92,1.05) | 1.02 (0.96,1.08) |
| P for trend             | 0.67                                             | 0.48             | 0.33             | 0.78             | 0.98             | 0.96             |
|                         | <b>Low-density lipoprotein cholesterol level</b> |                  |                  |                  |                  |                  |
| Quartile 1 $\beta$ (SE) | Reference                                        | Reference        | Reference        | Reference        | Reference        | Reference        |
| Quartile 2 $\beta$ (SE) | -1.24 (2.99)                                     | 5.04 (3.21)      | -2.12 (2.16)     | -0.18 (0.77)     | 0.46 (0.87)      | 1.2 (0.72)       |
| Quartile 3 $\beta$ (SE) | 2.53 (2.81)                                      | 9.51 (3.33)      | -1.22 (2.09)     | 0.3 (0.67)       | -0.69 (0.84)     | 1.48 (0.75)      |
| Quartile 4 $\beta$ (SE) | 0.17 (2.65)                                      | 5.04 (3.05)      | -0.74 (2.29)     | -0.24 (0.59)     | 0.55 (0.84)      | 0.17 (0.95)      |
| P for trend             | 0.78                                             | 0.13             | 0.87             | 0.80             | 0.79             | 0.41             |

Adjusted for age, sex, race, educational attainment, employment status, income, health insurance, usual source of care, level of social support (defined by score of six-survey items of social support), self-reported neighborhood characteristics (i.e., agreement with “This is a close-knit neighborhood”, “People in this neighborhood can be trusted”, “People around here are willing to help their neighbors”, and “How safe from crime do you consider your neighborhood to be?”), current cigarette smoking, self-reported diabetes status,

systolic blood pressure (in the statin use and LDL-C models only), diastolic blood pressure (in the statin use and LDL-C models only), body mass index, total cholesterol, physical functioning based on the Short Form 12 Physical Component Summary [PCS] score, mental health based on the Short Form 12 Mental Health Component Summary [MCS] score, aspirin use, and number of total prescription medications. Systolic blood pressure and diastolic blood pressure are not included in the blood pressure control outcome model.

CI = confidence interval; eGFR = estimated glomerular filtration rate; LDL-C = low-density lipoprotein cholesterol; PR = prevalence ratio; SE = standard error

**Table S9. Association between pharmacy proximity and antihypertensive medication use, statin use blood pressure control, and low-density lipoprotein level, separately, among REGARDS participants during visit 2, by 5-minute drive time.**

|                                        | Quartile 1       | Quartile 2       | Quartile 3       | Quartile 4       | P-for-trend |
|----------------------------------------|------------------|------------------|------------------|------------------|-------------|
| <b>Antihypertensive medication use</b> |                  |                  |                  |                  |             |
| <b>Rural</b>                           |                  |                  |                  |                  |             |
| <b>N = 2,875</b>                       |                  |                  |                  |                  |             |
| Cases, n                               | 806              | 344              | 434              | 830              |             |
| Prevalence, %                          | 82.3%            | 81.1%            | 85.9%            | 85.8%            |             |
| PR (95% CI)                            | 1.00 (Reference) | 0.94 (0.88,1.01) | 1.03 (0.98,1.07) | 0.99 (0.96,1.03) | 0.99        |
| <b>Suburban</b>                        |                  |                  |                  |                  |             |
| <b>N = 2,458</b>                       |                  |                  |                  |                  |             |
| Cases, n                               | 325              | 517              | 588              | 648              |             |
| Prevalence, %                          | 82.5%            | 84.8%            | 84.2%            | 85.7%            |             |
| PR (95% CI)                            | 1.00 (Reference) | 1.00 (0.95,1.05) | 0.98 (0.93,1.03) | 0.98 (0.94,1.03) | 0.29        |
| <b>Urban</b>                           |                  |                  |                  |                  |             |
| <b>N = 2,986</b>                       |                  |                  |                  |                  |             |
| Cases, n                               | 600              | 880              | 748              | 300              |             |
| Prevalence, %                          | 84.9%            | 84.1%            | 85.3%            | 84.3%            |             |
| PR (95% CI)                            | 1.00 (Reference) | 1.00 (0.94,1.07) | 1.00 (0.94,1.07) | 0.99 (0.92,1.06) | 0.59        |
| <b>Statin medication use</b>           |                  |                  |                  |                  |             |
| <b>Rural</b>                           |                  |                  |                  |                  |             |
| <b>N = 3,027</b>                       |                  |                  |                  |                  |             |
| Cases, n                               | 547              | 251              | 250              | 485              |             |
| Prevalence, %                          | 51.8%            | 54.9%            | 48.4%            | 48.5%            |             |
| PR (95% CI)                            | 1.00 (Reference) | 0.92 (0.82,1.04) | 0.99 (0.90,1.10) | 0.96 (0.89,1.04) | 0.39        |
| <b>Suburban</b>                        |                  |                  |                  |                  |             |
| <b>N = 2,541</b>                       |                  |                  |                  |                  |             |
| Cases, n                               | 211              | 339              | 360              | 380              |             |
| Prevalence, %                          | 50.6%            | 54.6%            | 49.8%            | 48.7%            |             |
| PR (95% CI)                            | 1.00 (Reference) | 1.01 (0.90,1.13) | 0.93 (0.83,1.05) | 0.95 (0.85,1.06) | 0.14        |
| <b>Urban</b>                           |                  |                  |                  |                  |             |
| <b>N = 3,001</b>                       |                  |                  |                  |                  |             |
| Cases, n                               | 335              | 534              | 457              | 176              |             |

|               |                  |                  |                  |                  |      |
|---------------|------------------|------------------|------------------|------------------|------|
| Prevalence, % | 49.9%            | 50.2%            | 50.6%            | 48.5%            |      |
| PR (95% CI)   | 1.00 (Reference) | 1.10 (0.95,1.28) | 1.04 (0.90,1.21) | 1.09 (0.93,1.28) | 0.99 |

**Blood pressure control**

**Rural**

**N = 2,875**

|               |                  |                  |                  |                  |      |
|---------------|------------------|------------------|------------------|------------------|------|
| Cases, n      | 788              | 328              | 405              | 763              |      |
| Prevalence, % | 80.5%            | 77.4%            | 80.2%            | 78.9%            |      |
| PR (95% CI)   | 1.00 (Reference) | 0.96 (0.89,1.03) | 1.06 (1.01,1.12) | 0.99 (0.94,1.03) | 0.93 |

**Suburban**

**N = 2,458**

|               |                  |                  |                  |                  |      |
|---------------|------------------|------------------|------------------|------------------|------|
| Cases, n      | 315              | 481              | 576              | 608              |      |
| Prevalence, % | 79.9%            | 78.9%            | 82.5%            | 80.4%            |      |
| PR (95% CI)   | 1.00 (Reference) | 0.96 (0.90,1.02) | 0.97 (0.91,1.04) | 0.99 (0.94,1.05) | 0.72 |

**Urban**

**N = 2,986**

|               |                  |                  |                  |                  |      |
|---------------|------------------|------------------|------------------|------------------|------|
| Cases, n      | 593              | 847              | 713              | 303              |      |
| Prevalence, % | 83.9%            | 81.0%            | 81.3%            | 85.1%            |      |
| PR (95% CI)   | 1.00 (Reference) | 0.95 (0.89,1.02) | 0.94 (0.88,1.01) | 0.95 (0.88,1.02) | 0.29 |

**Low-density lipoprotein cholesterol level**

**Rural**

**N = 3,027**

|                |                  |                  |                    |                  |      |
|----------------|------------------|------------------|--------------------|------------------|------|
| Median (range) | 96.5 (23.7, 251) | 93.9 (31.9, 254) | 94.2 (30.0, 272.9) | 96 (11.8, 263.6) | -    |
| $\beta$ (SE)   | (Reference)      | 0.74 (0.82)      | 1.23 (0.77)        | -0.18 (0.57)     | 0.92 |

**Suburban**

**N = 2,541**

|                |                    |                    |                    |                    |      |
|----------------|--------------------|--------------------|--------------------|--------------------|------|
| Median (range) | 94.5 (22.2, 220.6) | 94.3 (17.0, 212.3) | 94.3 (26.0, 241.3) | 94.2 (23.3, 278.4) |      |
| $\beta$ (SE)   | (Reference)        | -1.08 (0.89)       | 0.53 (0.89)        | -1.08 (0.86)       | 0.52 |

**Urban**

**N = 3,001**

|                |                    |                    |                   |                    |      |
|----------------|--------------------|--------------------|-------------------|--------------------|------|
| Median (range) | 95.9 (21.9, 267.2) | 93.7 (21.4, 382.8) | 95.2 (6.8, 268.2) | 94.9 (32.2, 212.8) |      |
| $\beta$ (SE)   | (Reference)        | -0.75 (1.12)       | 0.11 (1.13)       | -0.64 (1.19)       | 0.74 |

Adjusted for age, sex, race, educational attainment, employment status, income, health insurance, usual source of care, car ownership, level of social support (defined by score of six-survey items of social support), self-reported neighborhood

characteristics (i.e., agreement with “This is a close-knit neighborhood”, “People in this neighborhood can be trusted”, “People around here are willing to help their neighbors”, and “How safe from crime do you consider your neighborhood to be?”), current cigarette smoking, self-reported diabetes status, systolic blood pressure (in the statin use and LDL-C models only), diastolic blood pressure (in the statin use and LDL-C models only), body mass index, total cholesterol, physical functioning based on the Short Form 12 Physical Component Summary [PCS] score, mental health based on the Short Form 12 Mental Health Component Summary [MCS] score, aspirin use, and number of total prescription medications. Systolic blood pressure and diastolic blood pressure are not included in the blood pressure control outcome model.

CI = confidence interval; eGFR = estimated glomerular filtration rate; LDL-C = low-density lipoprotein cholesterol; PR = prevalence ratio; SE = standard error

**Table S10. Association between pharmacy proximity and antihypertensive medication use, statin use blood pressure control, and low-density lipoprotein level, separately, among REGARDS participants during visit 2, by 20-minute drive time.**

|                                        | Quartile 1       | Quartile 2       | Quartile 3       | Quartile 4       | P-for-trend |
|----------------------------------------|------------------|------------------|------------------|------------------|-------------|
| <b>Antihypertensive medication use</b> |                  |                  |                  |                  |             |
| <b>Rural</b>                           |                  |                  |                  |                  |             |
| <b>N = 2,875</b>                       |                  |                  |                  |                  |             |
| Cases, n                               | 806              | 344              | 434              | 830              |             |
| Prevalence, %                          | 82.3%            | 81.1%            | 85.9%            | 85.8%            |             |
| PR (95% CI)                            | 1.00 (Reference) | 1.03 (0.98,1.08) | 1.02 (0.97,1.07) | 1.04 (0.99,1.08) | 0.13        |
| <b>Suburban</b>                        |                  |                  |                  |                  |             |
| <b>N = 2,458</b>                       |                  |                  |                  |                  |             |
| Cases, n                               | 325              | 517              | 588              | 648              |             |
| Prevalence, %                          | 82.5%            | 84.8%            | 84.2%            | 85.7%            |             |
| PR (95% CI)                            | 1.00 (Reference) | 1.04 (0.99,1.09) | 1.04 (0.99,1.09) | 1.02 (0.97,1.07) | 0.55        |
| <b>Urban</b>                           |                  |                  |                  |                  |             |
| <b>N = 2,986</b>                       |                  |                  |                  |                  |             |
| Cases, n                               | 600              | 880              | 748              | 300              |             |
| Prevalence, %                          | 84.9%            | 84.1%            | 85.3%            | 84.3%            |             |
| PR (95% CI)                            | 1.00 (Reference) | 1.01 (0.97,1.05) | 1.02 (0.98,1.06) | 1.00 (0.95,1.04) | 0.76        |
| <b>Statin medication use</b>           |                  |                  |                  |                  |             |
| <b>Rural</b>                           |                  |                  |                  |                  |             |
| <b>N = 3,027</b>                       |                  |                  |                  |                  |             |
| Cases, n                               | 547              | 251              | 250              | 485              |             |
| Prevalence, %                          | 51.8%            | 54.9%            | 48.4%            | 48.5%            |             |
| PR (95% CI)                            | 1.00 (Reference) | 0.95 (0.87,1.05) | 0.94 (0.86,1.03) | 0.90 (0.83,0.98) | 0.02        |
| <b>Suburban</b>                        |                  |                  |                  |                  |             |
| <b>N = 2,541</b>                       |                  |                  |                  |                  |             |
| Cases, n                               | 211              | 339              | 360              | 380              |             |
| Prevalence, %                          | 50.6%            | 54.6%            | 49.8%            | 48.7%            |             |
| PR (95% CI)                            | 1.00 (Reference) | 0.95 (0.86,1.05) | 0.98 (0.89,1.07) | 0.86 (0.78,0.96) | 0.01        |
| <b>Urban</b>                           |                  |                  |                  |                  |             |
| <b>N = 3,001</b>                       |                  |                  |                  |                  |             |
| Cases, n                               | 335              | 534              | 457              | 176              |             |

|                                                                                                                                                                                                                                                     |                    |                    |                    |                    |      |
|-----------------------------------------------------------------------------------------------------------------------------------------------------------------------------------------------------------------------------------------------------|--------------------|--------------------|--------------------|--------------------|------|
| Prevalence, %                                                                                                                                                                                                                                       | 49.9%              | 50.2%              | 50.6%              | 48.5%              |      |
| PR (95% CI)                                                                                                                                                                                                                                         | 1.00 (Reference)   | 1.12 (1.03,1.22)   | 1.04 (0.95,1.14)   | 1.14 (1.04,1.26)   | 0.05 |
| <b>Blood pressure control</b>                                                                                                                                                                                                                       |                    |                    |                    |                    |      |
| <b>Rural</b>                                                                                                                                                                                                                                        |                    |                    |                    |                    |      |
| <b>N = 2,875</b>                                                                                                                                                                                                                                    |                    |                    |                    |                    |      |
| Cases, n                                                                                                                                                                                                                                            | 788                | 328                | 405                | 763                | -    |
| Prevalence, %                                                                                                                                                                                                                                       | 80.5%              | 77.4%              | 80.2%              | 78.9%              |      |
| PR (95% CI)                                                                                                                                                                                                                                         | 1.00 (Reference)   | 1.02 (0.96,1.08)   | 1.02 (0.97,1.08)   | 1.03 (0.98,1.09)   | 0.21 |
| <b>Suburban</b>                                                                                                                                                                                                                                     |                    |                    |                    |                    |      |
| <b>N = 2,458</b>                                                                                                                                                                                                                                    |                    |                    |                    |                    |      |
| Cases, n                                                                                                                                                                                                                                            | 315                | 481                | 576                | 608                |      |
| Prevalence, %                                                                                                                                                                                                                                       | 79.9%              | 78.9%              | 82.5%              | 80.4%              |      |
| PR (95% CI)                                                                                                                                                                                                                                         | 1.00 (Reference)   | 1.00 (0.94,1.06)   | 1.06 (1.00,1.12)   | 1.00 (0.94,1.06)   | 0.50 |
| <b>Urban</b>                                                                                                                                                                                                                                        |                    |                    |                    |                    |      |
| <b>N = 2,986</b>                                                                                                                                                                                                                                    |                    |                    |                    |                    |      |
| Cases, n                                                                                                                                                                                                                                            | 593                | 847                | 713                | 303                |      |
| Prevalence, %                                                                                                                                                                                                                                       | 83.9%              | 81.0%              | 81.3%              | 85.1%              |      |
| PR (95% CI)                                                                                                                                                                                                                                         | 1.00 (Reference)   | 0.98 (0.94,1.02)   | 1.00 (0.95,1.04)   | 1.03 (0.98,1.08)   | 0.30 |
| <b>Low-density lipoprotein cholesterol level</b>                                                                                                                                                                                                    |                    |                    |                    |                    |      |
| <b>Rural</b>                                                                                                                                                                                                                                        |                    |                    |                    |                    |      |
| <b>N = 3,027</b>                                                                                                                                                                                                                                    |                    |                    |                    |                    |      |
| Median (range)                                                                                                                                                                                                                                      | 96.5 (23.7, 251)   | 93.9 (31.9, 254)   | 94.2 (30.0, 272.9) | 96 (11.8, 263.6)   |      |
| $\beta$ (SE)                                                                                                                                                                                                                                        | (Reference)        | -0.65 (0.71)       | 0.12 (0.68)        | 0.69 (0.63)        | 0.17 |
| <b>Suburban</b>                                                                                                                                                                                                                                     |                    |                    |                    |                    |      |
| <b>N = 2,541</b>                                                                                                                                                                                                                                    |                    |                    |                    |                    |      |
| Median (range)                                                                                                                                                                                                                                      | 94.5 (22.2, 220.6) | 94.3 (17.0, 212.3) | 94.3 (26.0, 241.3) | 94.2 (23.3, 278.4) |      |
| $\beta$ (SE)                                                                                                                                                                                                                                        | (Reference)        | 0.75 (0.8)         | 1.29 (0.81)        | 1.79 (0.82)        | 0.02 |
| <b>Urban</b>                                                                                                                                                                                                                                        |                    |                    |                    |                    |      |
| <b>N = 3,001</b>                                                                                                                                                                                                                                    |                    |                    |                    |                    |      |
| Median (range)                                                                                                                                                                                                                                      | 95.9 (21.9, 267.2) | 93.7 (21.4, 382.8) | 95.2 (6.8, 268.2)  | 94.9 (32.2, 212.8) |      |
| $\beta$ (SE)                                                                                                                                                                                                                                        | (Reference)        | 0.85 (0.63)        | 1.57 (0.69)        | -0.93 (0.79)       | 0.79 |
| Adjusted for age, sex, race, educational attainment, employment status, income, health insurance, usual source of care, car ownership, level of social support (defined by score of six-survey items of social support), self-reported neighborhood |                    |                    |                    |                    |      |

characteristics (i.e., agreement with “This is a close-knit neighborhood”, “People in this neighborhood can be trusted”, “People around here are willing to help their neighbors”, and “How safe from crime do you consider your neighborhood to be?”), current cigarette smoking, self-reported diabetes status, systolic blood pressure (in the statin use and LDL-C models only), diastolic blood pressure (in the statin use and LDL-C models only), body mass index, total cholesterol, physical functioning based on the Short Form 12 Physical Component Summary [PCS] score, mental health based on the Short Form 12 Mental Health Component Summary [MCS] score, aspirin use, and number of total prescription medications. Systolic blood pressure and diastolic blood pressure are not included in the blood pressure control outcome model.

CI = confidence interval; eGFR = estimated glomerular filtration rate; LDL-C = low-density lipoprotein cholesterol; PR = prevalence ratio; SE = standard error



**Figure S1. Directed acyclic graphs for statistical analyses.**

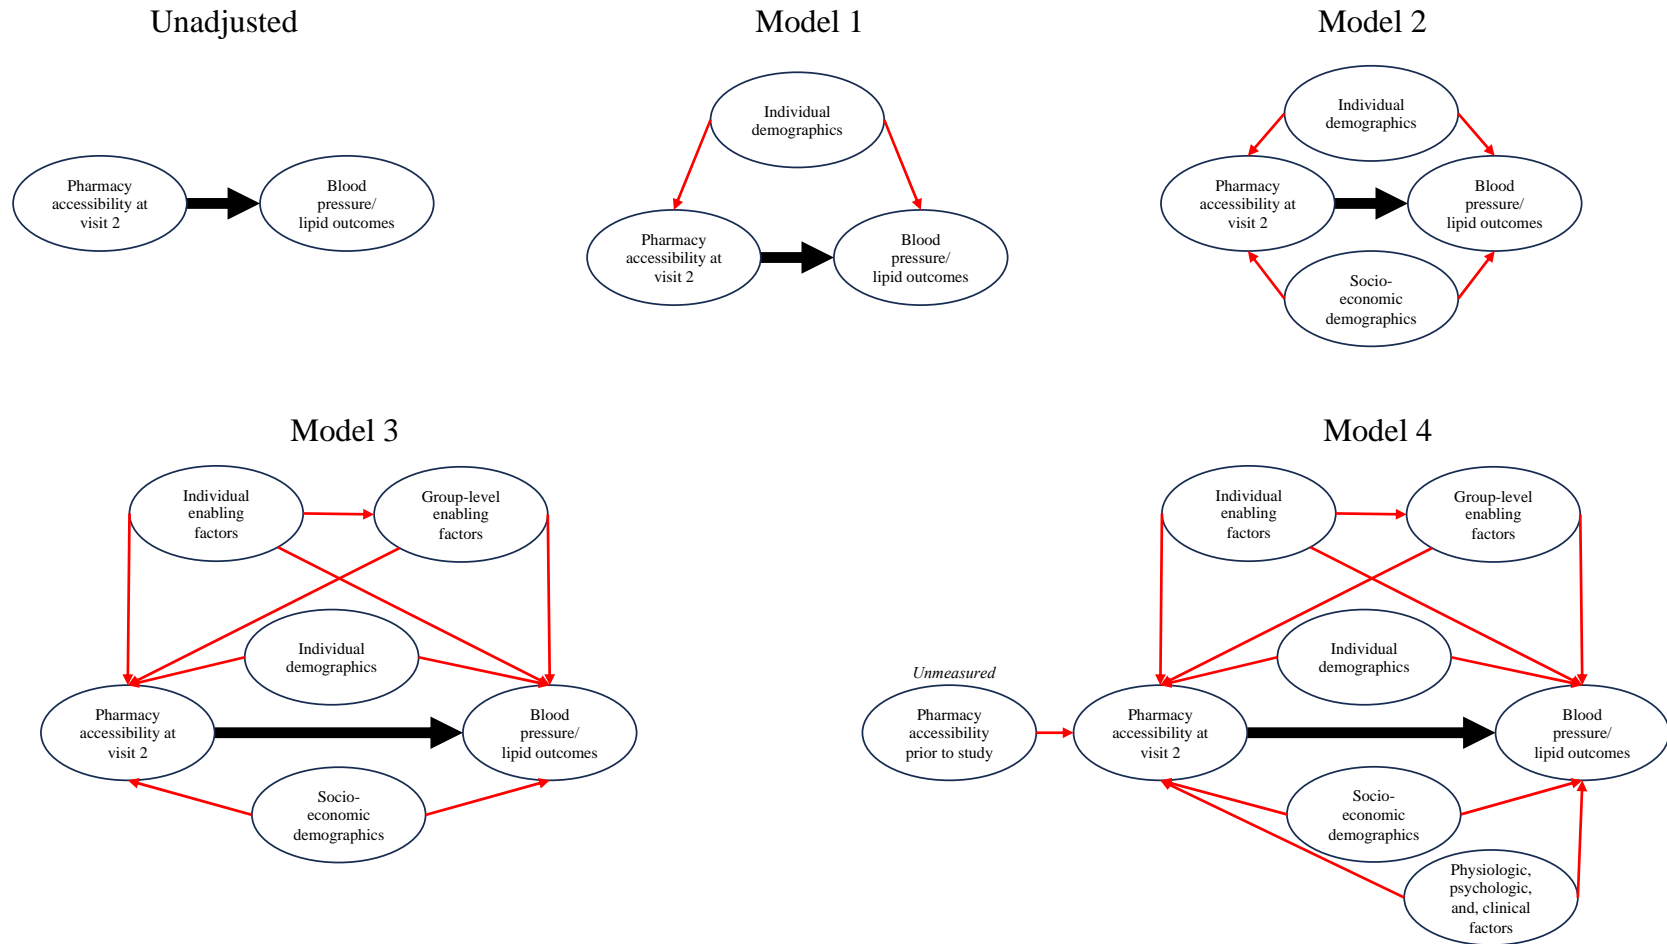

\*Blood pressure not included in blood pressure outcome

**Figure S2. Correlation matrix of all variables.**

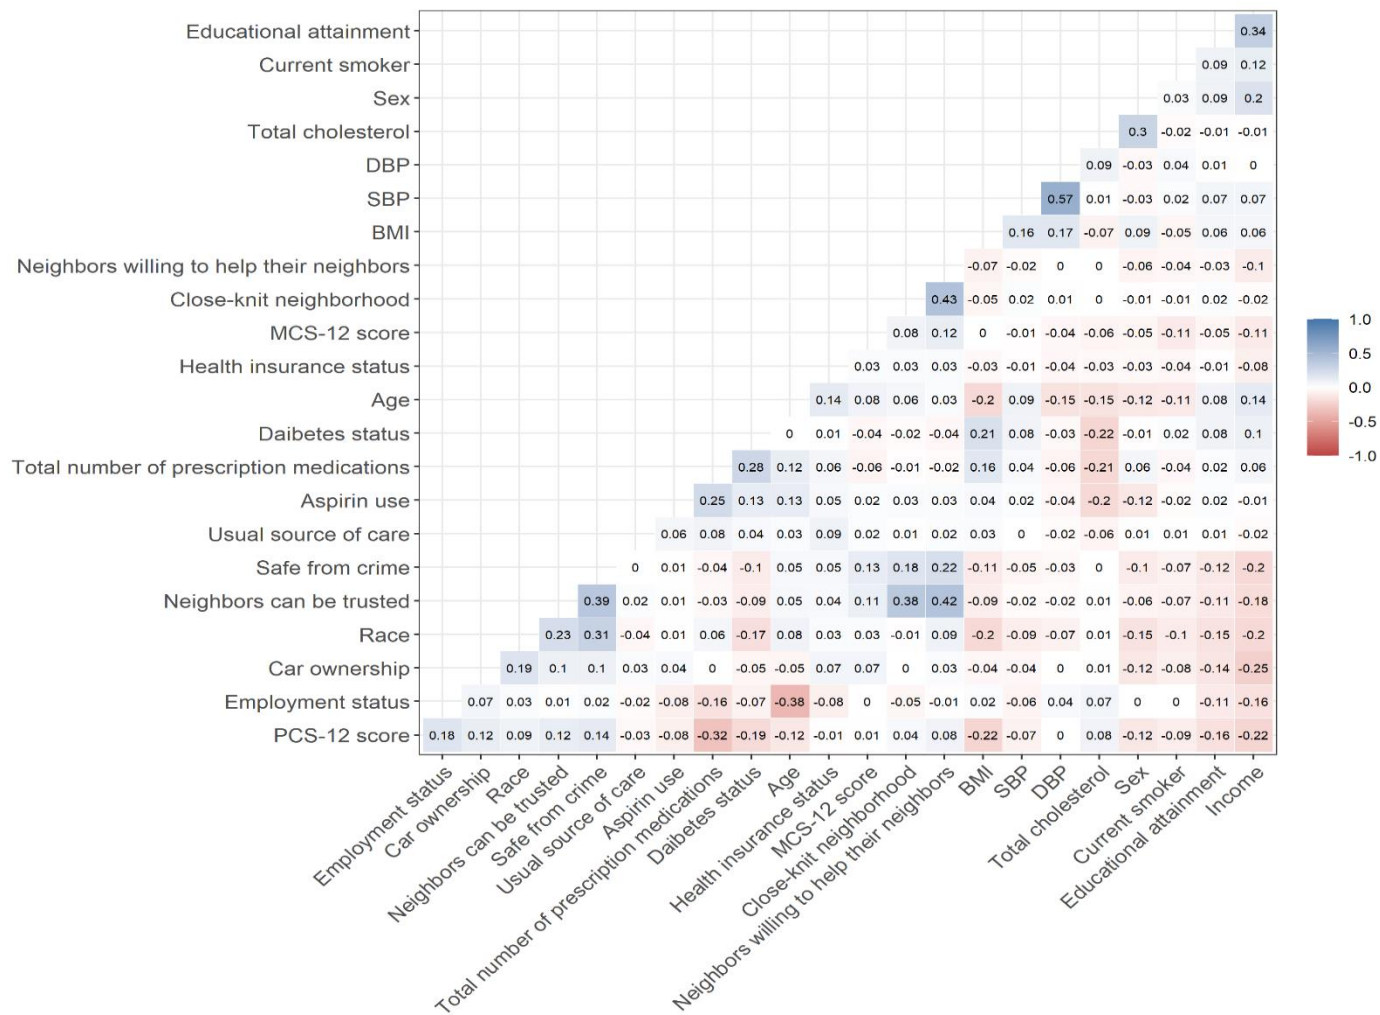

BMI = body mass index; PCS = Physical Component Summary; MCS = Mental Health Component Summary; SBP = systolic blood pressure; DBP = diastolic blood pressure
